# Supplementary material for: The roles of MTRR and MTHFR gene polymorphisms in congenital heart diseases: a meta-analysis
Source: PubMed Central journal article supplement (PMC6435561; doi:10.1042/bsr20181160), 2018-12-07
Supplement: bsr20181160_Supp1.pdf [file bsr20181160_Supp1.pdf]

**For relationship between *MTHFR* polymorphisms and CHD:**

(methylenetetrahydrofolate reductase OR *MTHFR*) AND (polymorphism OR variant OR mutation OR genotype OR allele) AND (congenital heart disease OR congenital heart defect OR congenital cardiovascular malformation)

**For relationship between *MTRR* polymorphisms and CHD:**

(5-methyltetrahydrofolate-homocysteine methyltransferase reductase OR methionine synthase reductase OR *MTRR* OR *MSR*) AND (polymorphism OR variant OR mutation OR genotype OR allele) AND (congenital heart disease OR congenital heart defect OR congenital cardiovascular malformation)

## Forest plots of investigated polymorphisms

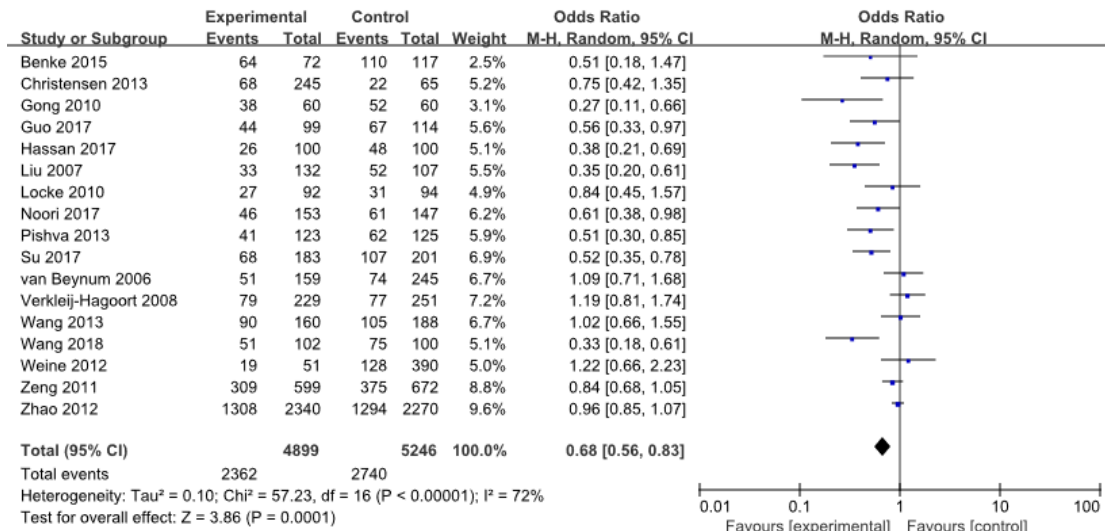

Forest plot of rs1801394 polymorphism and CHD under dominant comparison

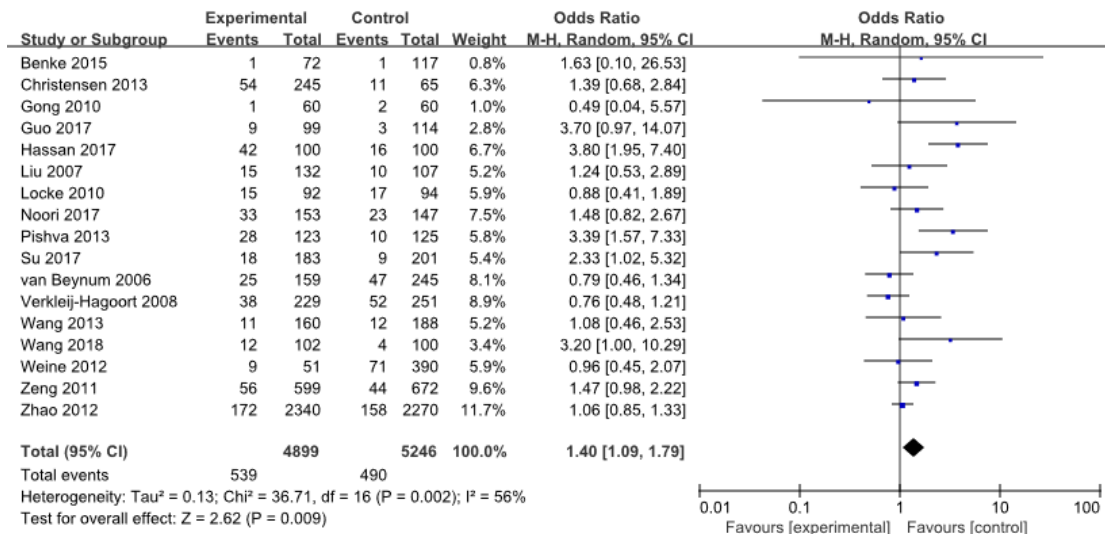

Forest plot of rs1801394 polymorphism and CHD under recessive comparison

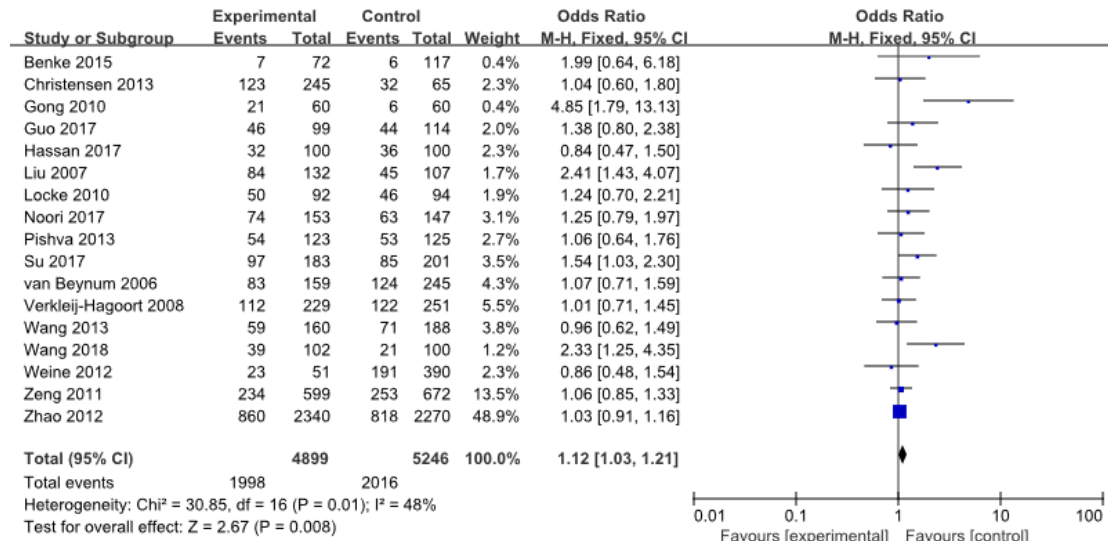

Forest plot of rs1801394 polymorphism and CHD under additive comparison

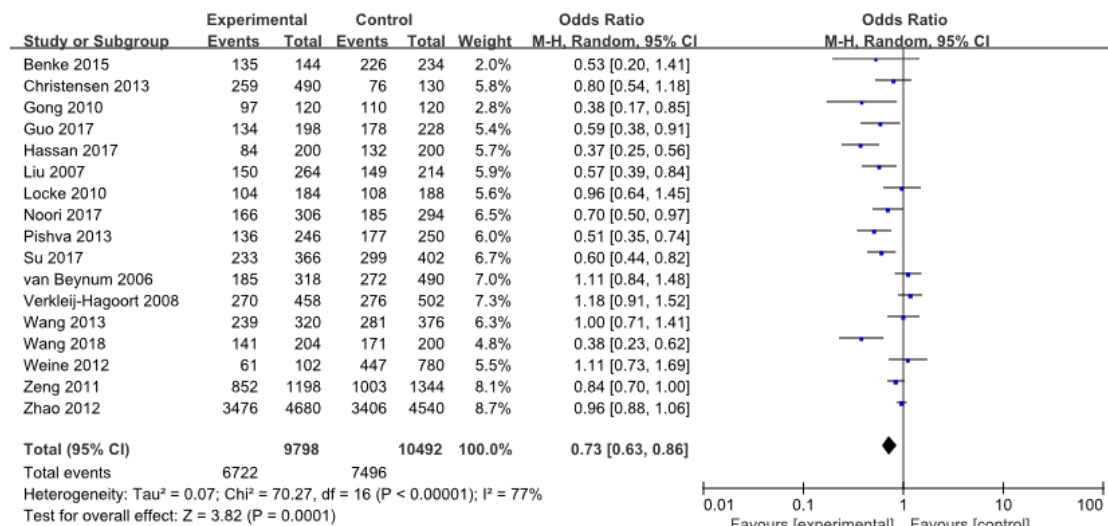

Forest plot of rs1801394 polymorphism and CHD under allele comparison

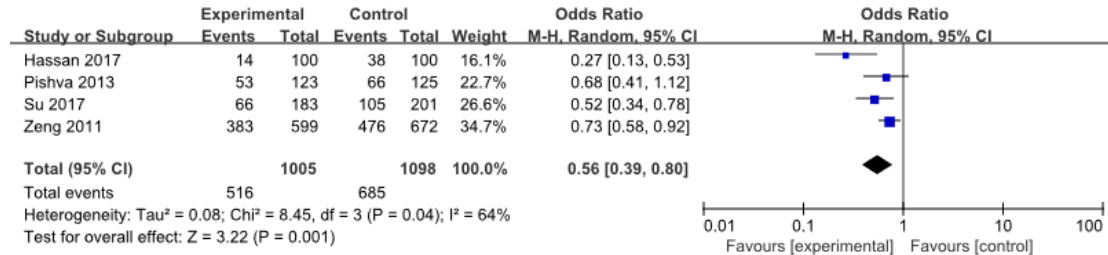

Forest plot of rs1532268 polymorphism and CHD under dominant comparison

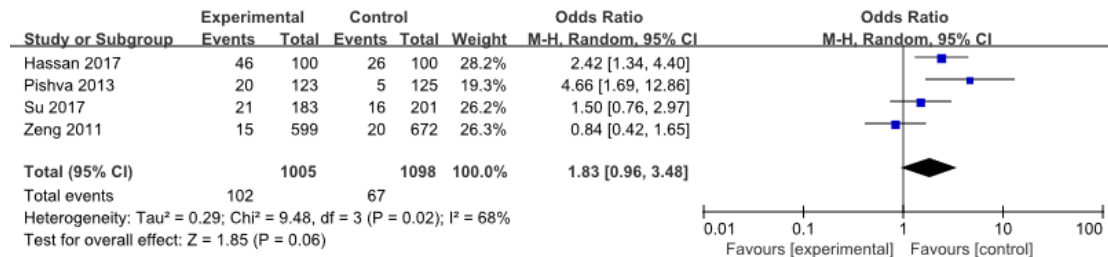

Forest plot of rs1532268 polymorphism and CHD under recessive comparison

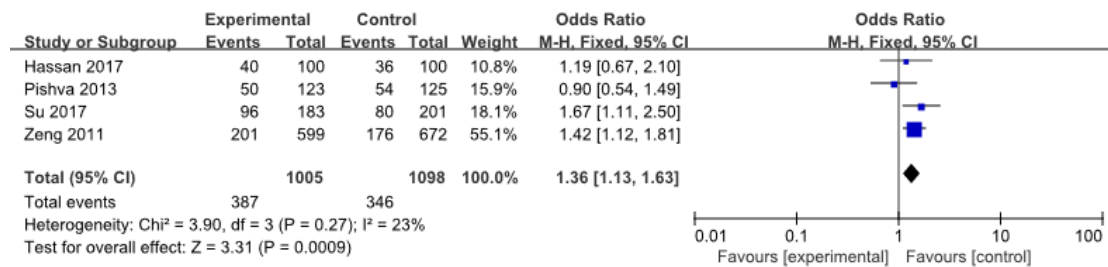

Forest plot of rs1532268 polymorphism and CHD under additive comparison

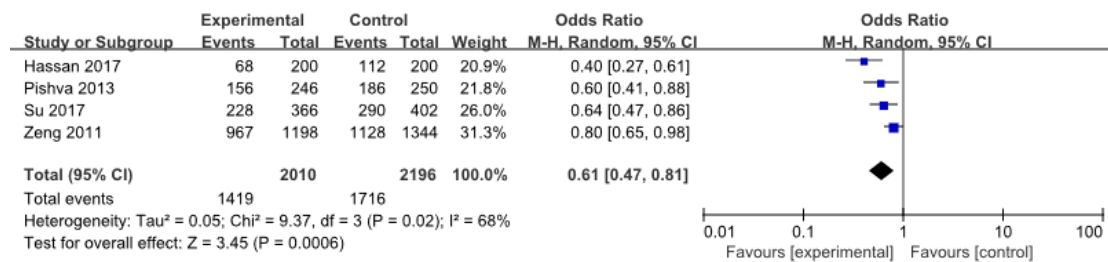

Forest plot of rs1532268 polymorphism and CHD under allele comparison

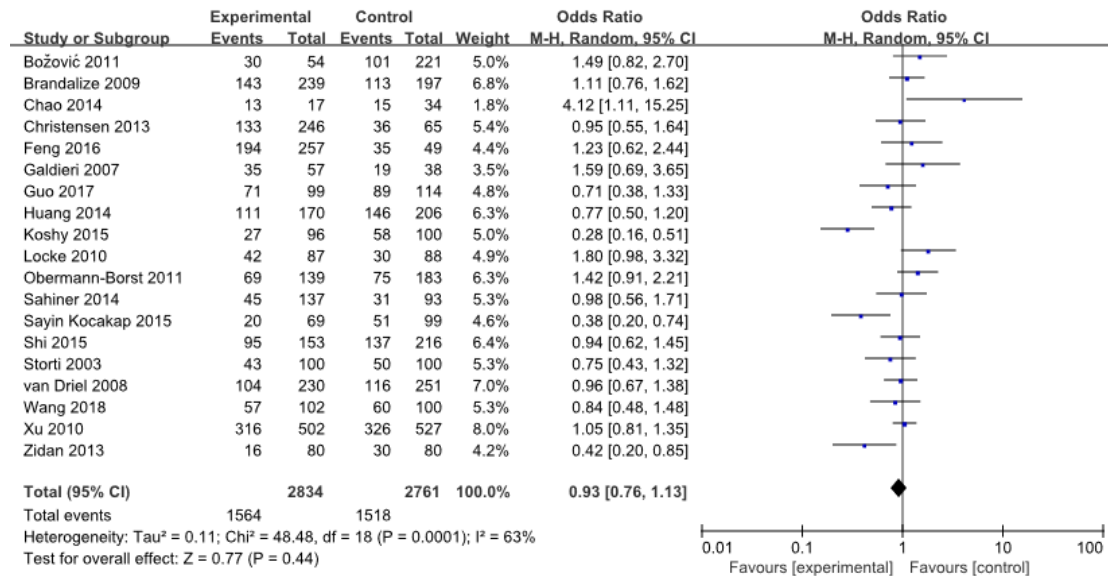

Forest plot of rs1801131 polymorphism and CHD under dominant comparison

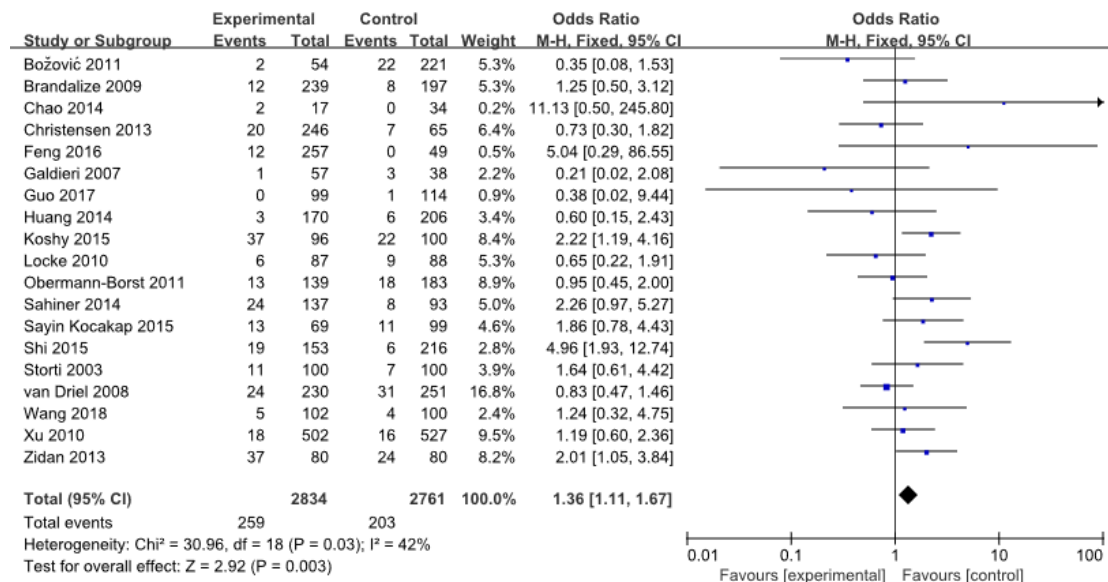

Forest plot of rs1801131 polymorphism and CHD under recessive comparison

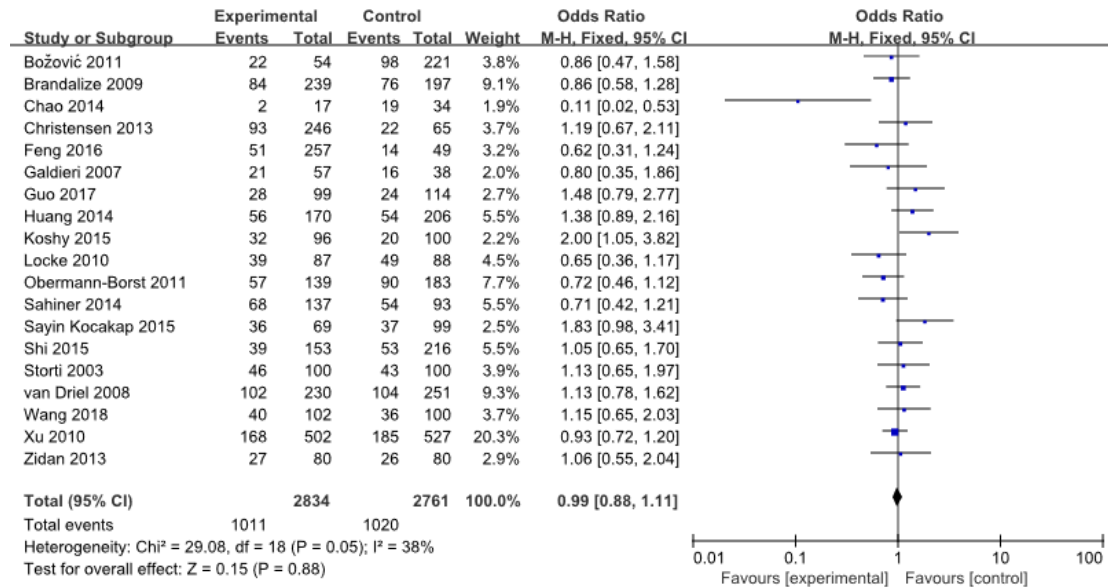

Forest plot of rs1801131 polymorphism and CHD under additive comparison

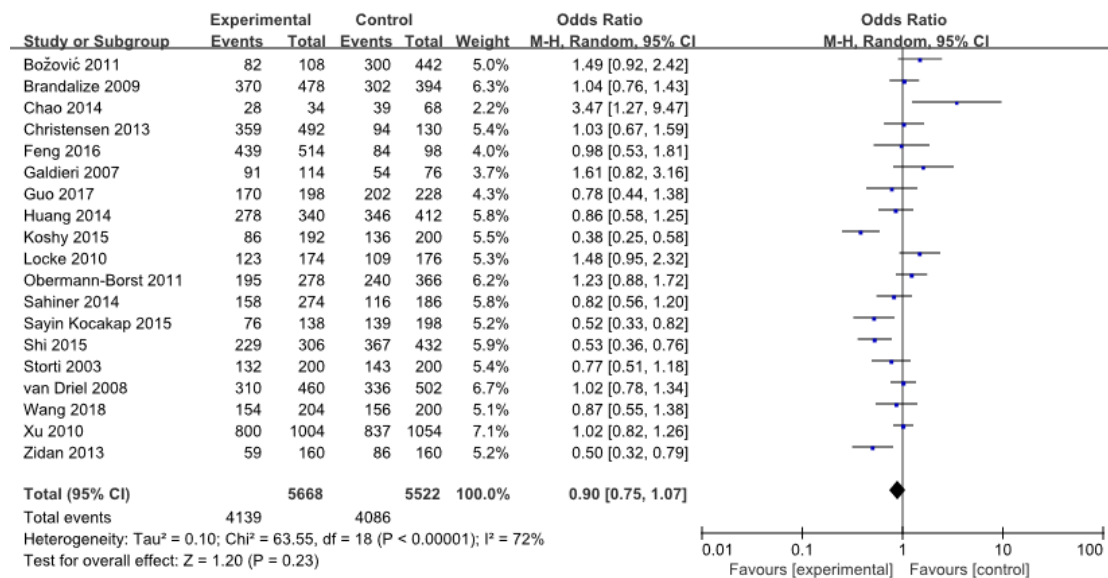

Forest plot of rs1801131 polymorphism and CHD under allele comparison

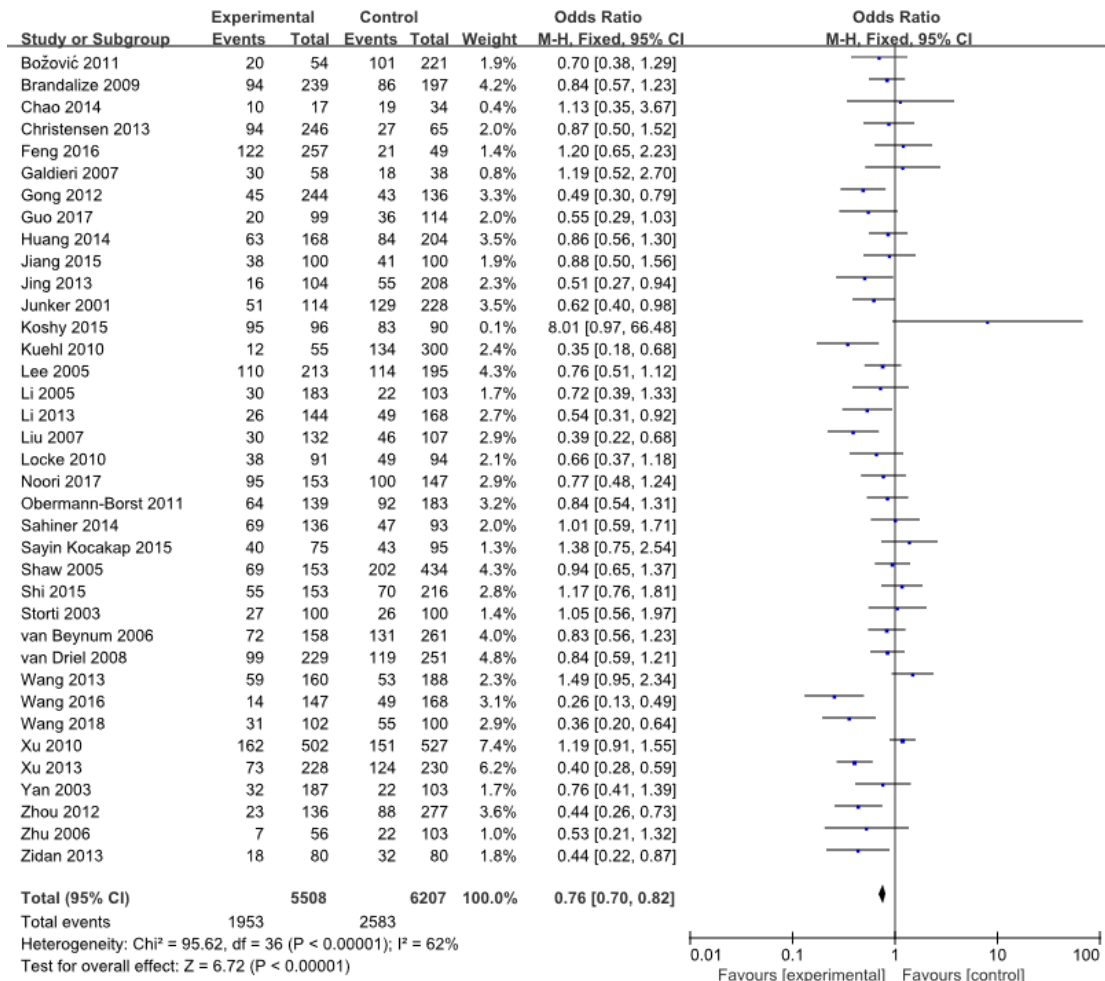

Forest plot of rs1801133 polymorphism and CHD under dominant comparison

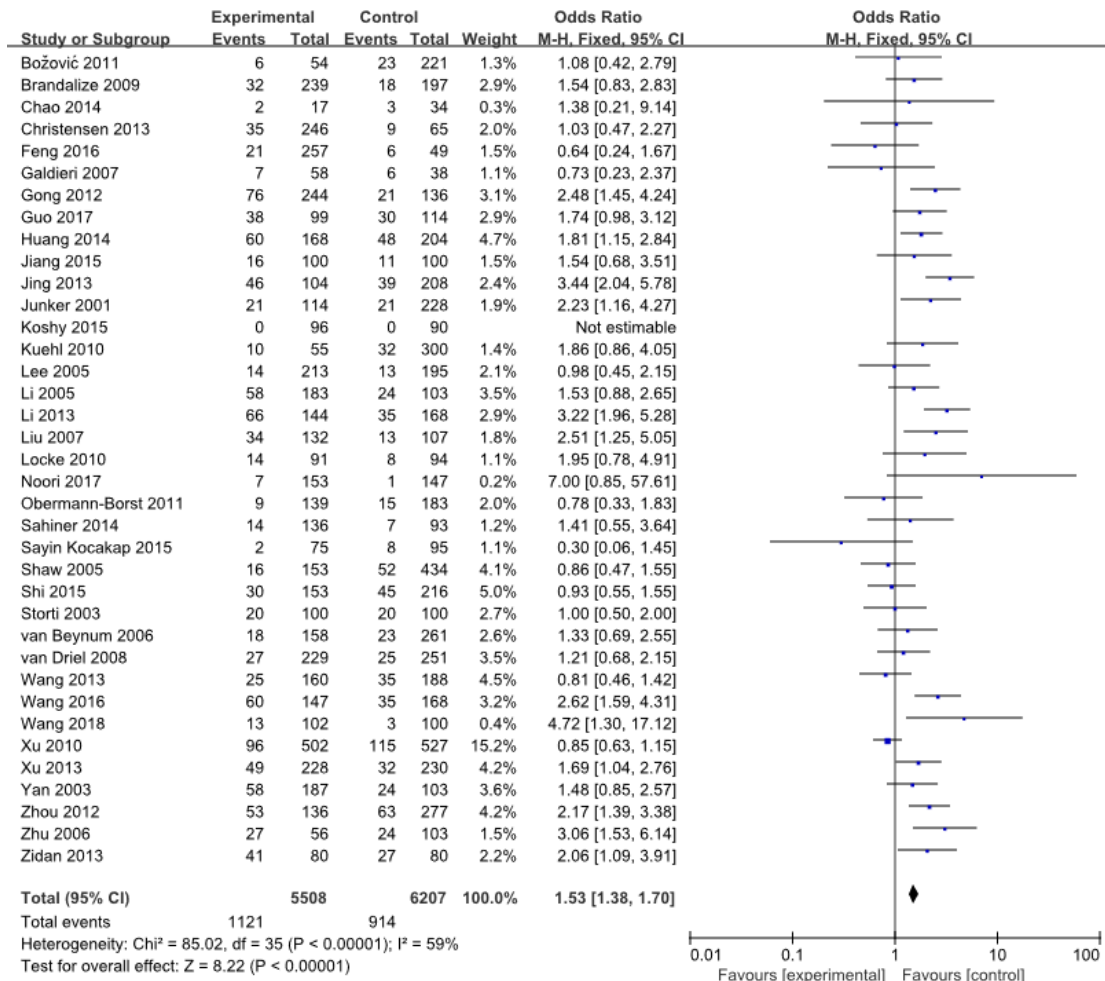

Forest plot of rs1801133 polymorphism and CHD under recessive comparison



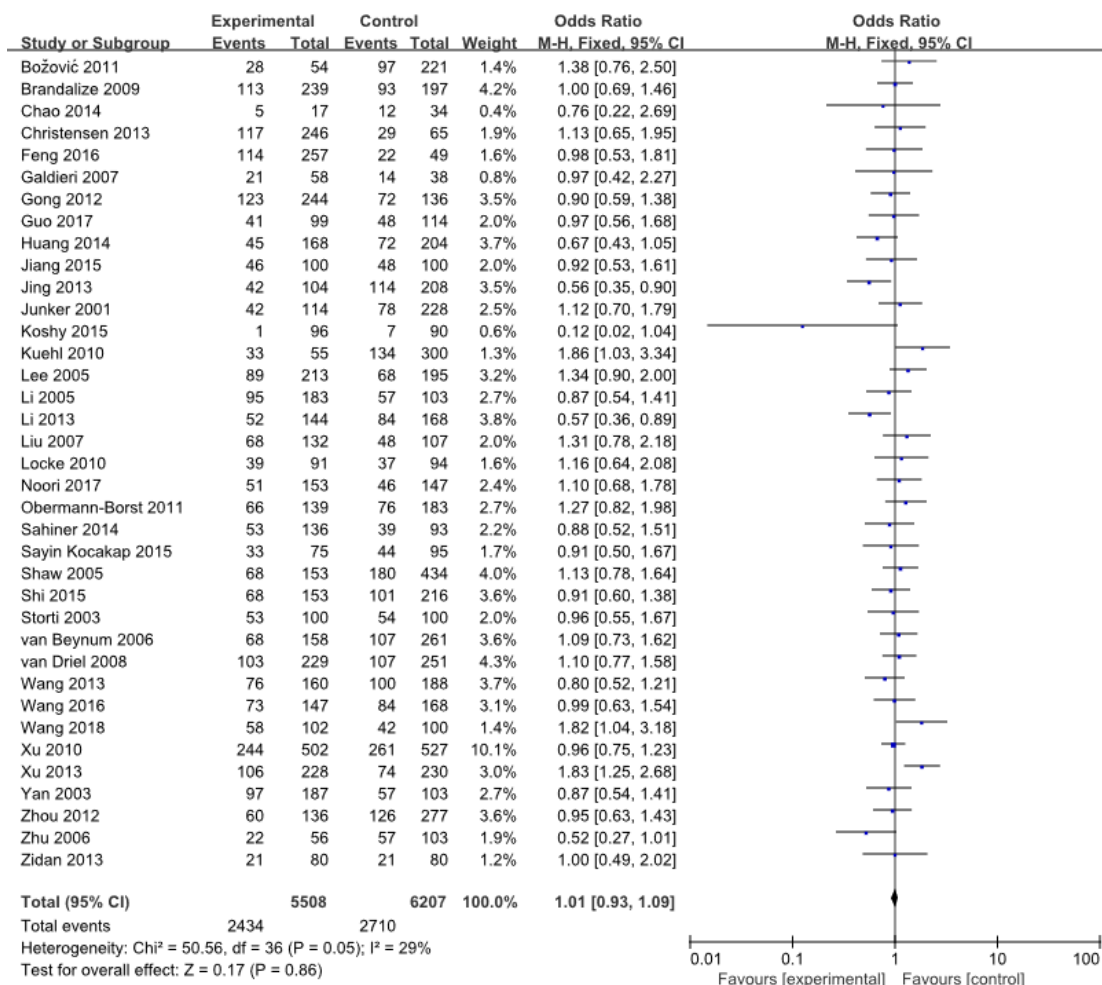

Forest plot of rs1801133 polymorphism and CHD under additive comparison

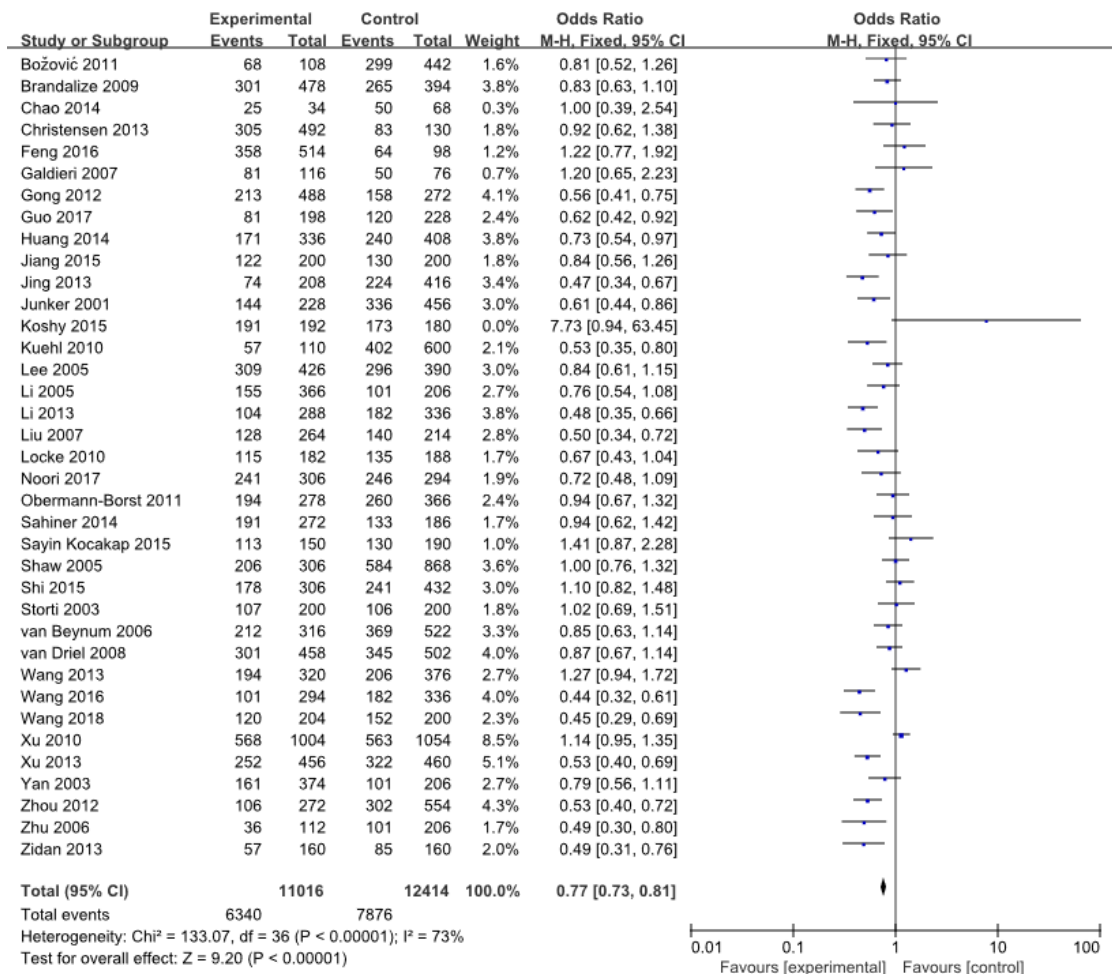

Forest plot of **rs1801133** polymorphism and CHD under allele comparison

## Funnel plots of investigated polymorphisms

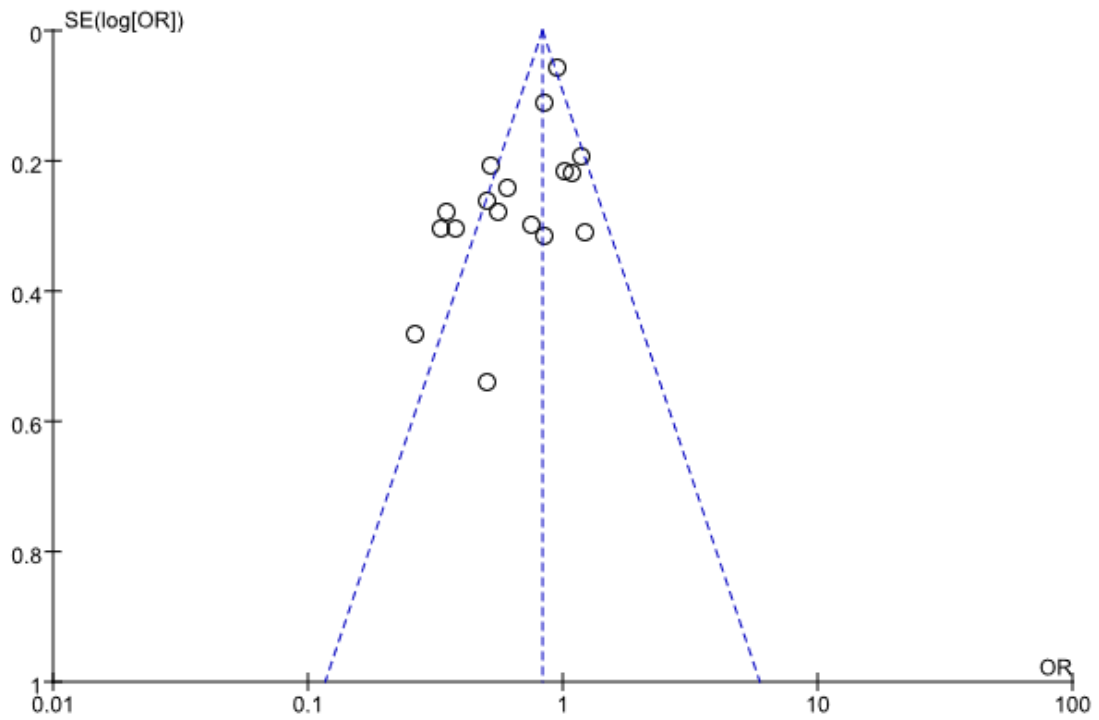

Funnel plot of **rs1801394** polymorphism and CHD under dominant comparison

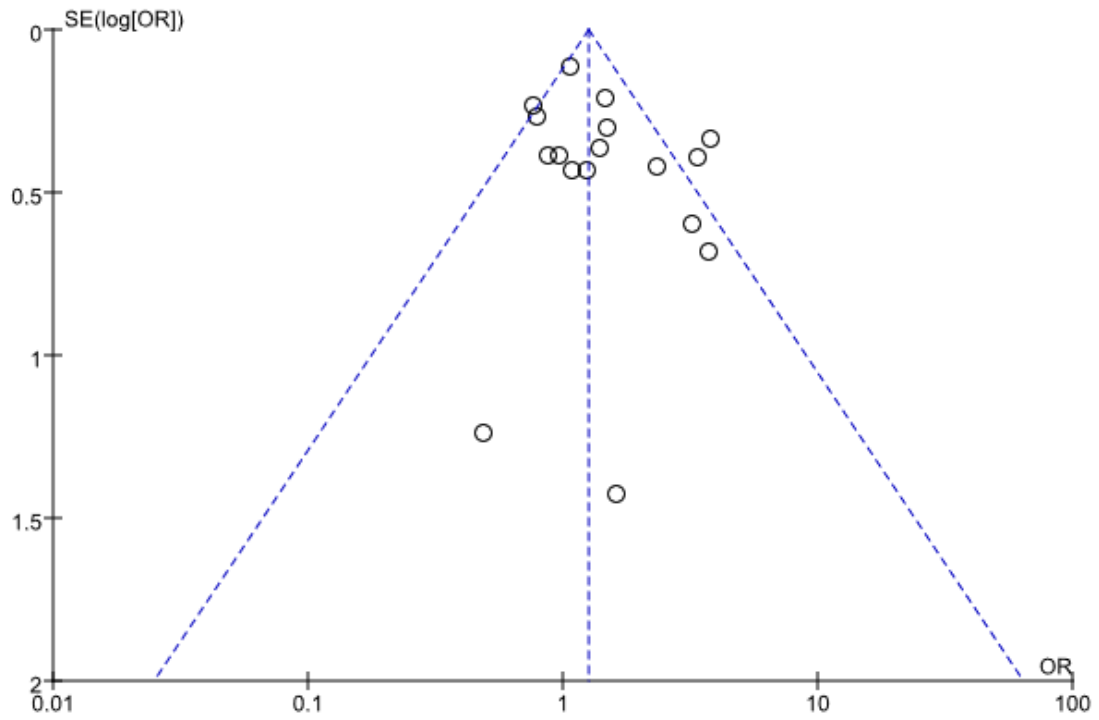

Funnel plot of **rs1801394** polymorphism and CHD under recessive comparison

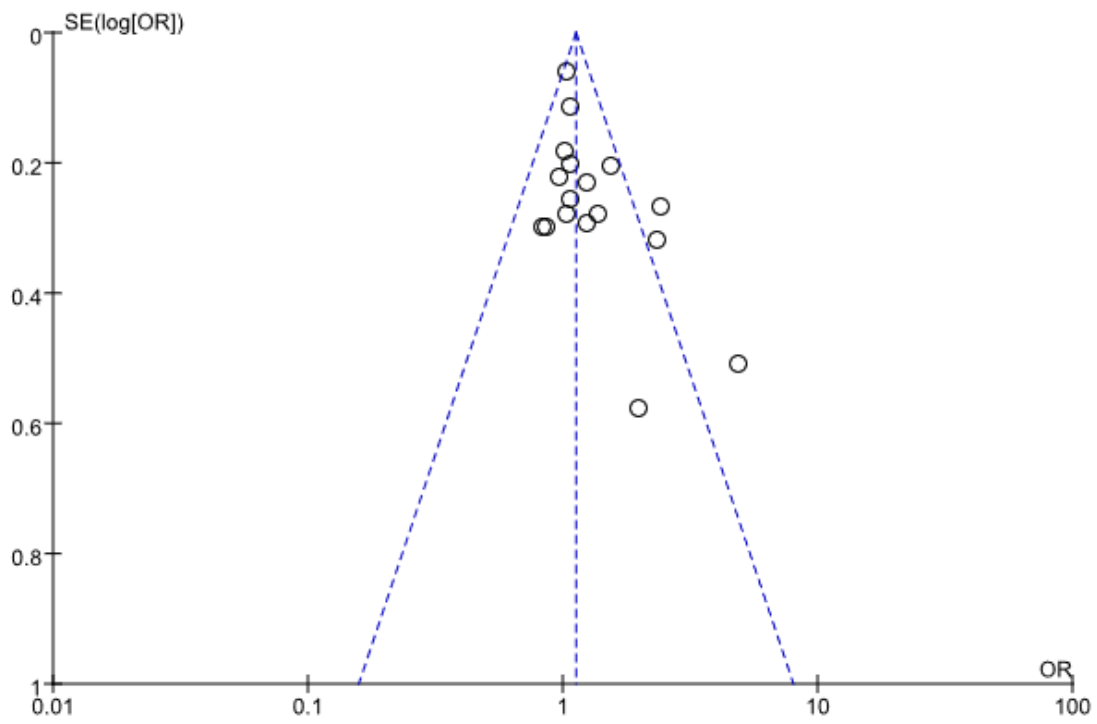

Funnel plot of **rs1801394** polymorphism and CHD under additive comparison

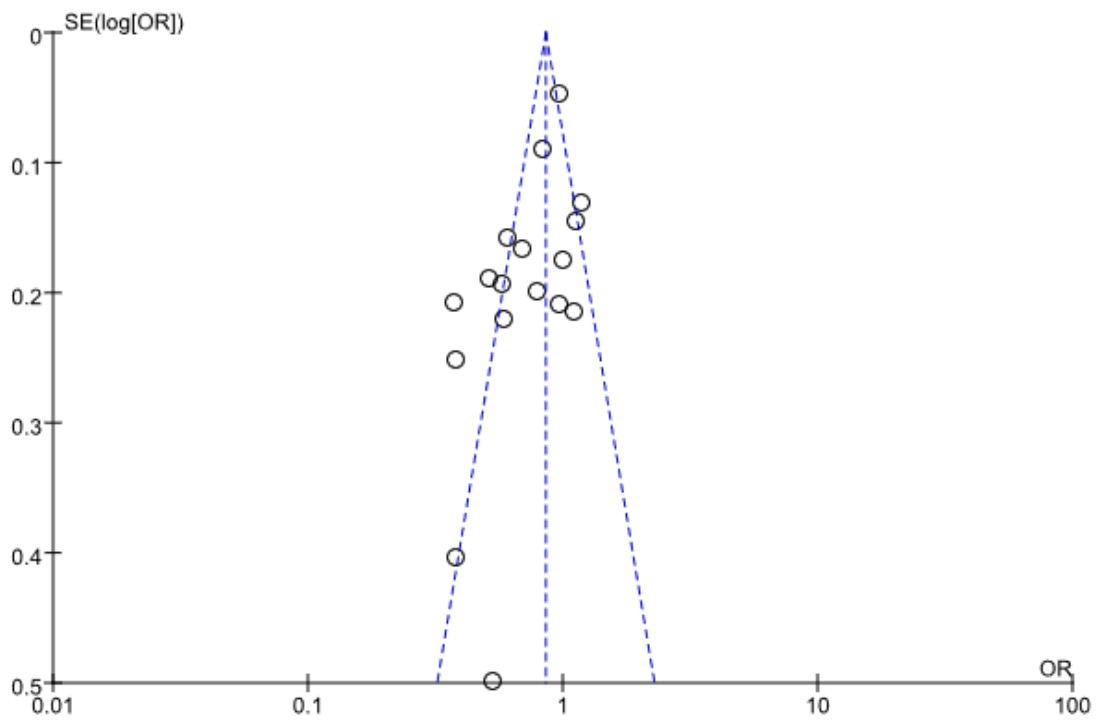

Funnel plot of **rs1801394** polymorphism and CHD under allele comparison

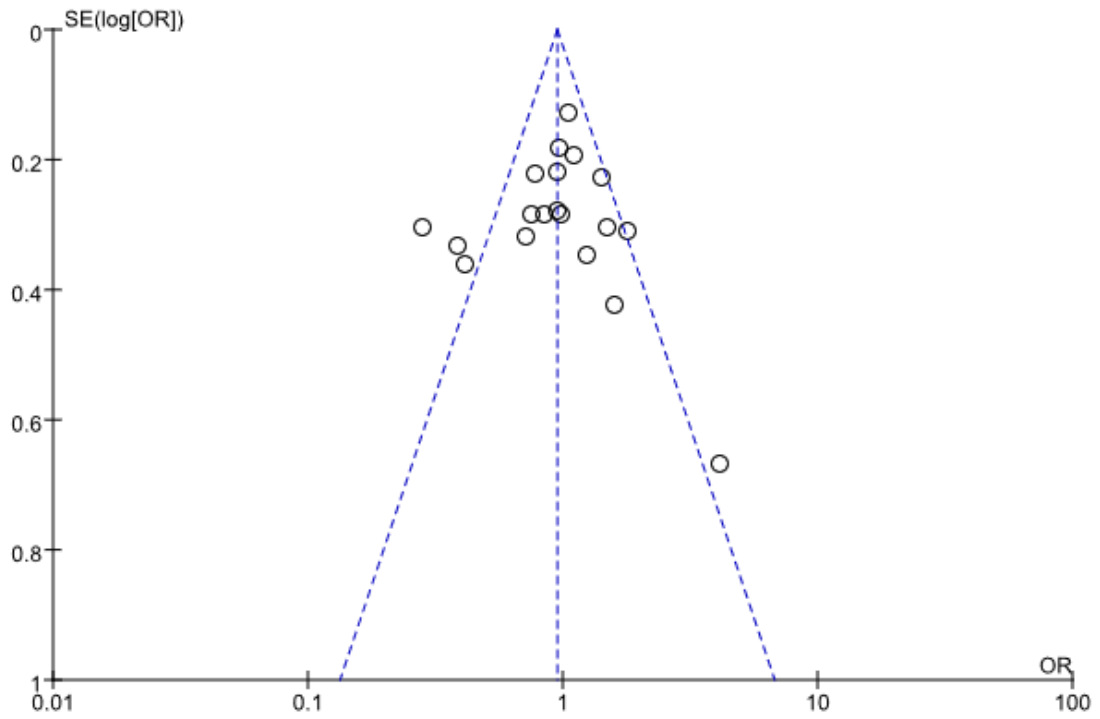

Funnel plot of **rs1801131** polymorphism and CHD under dominant comparison

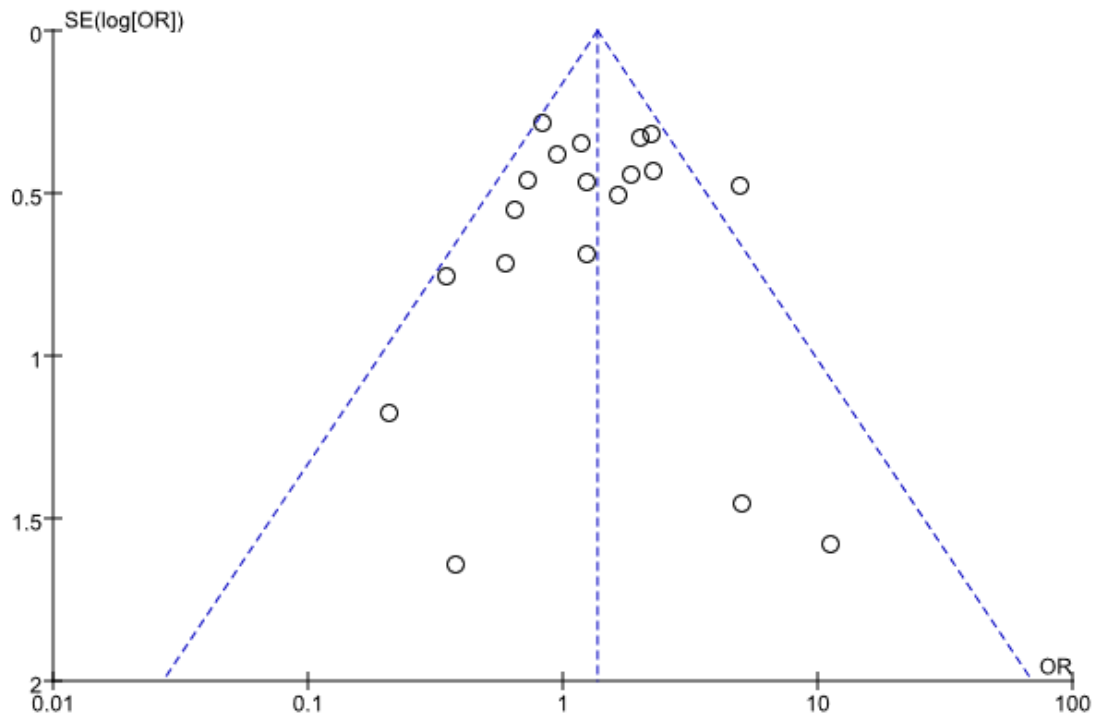

Funnel plot of **rs1801131** polymorphism and CHD under recessive comparison

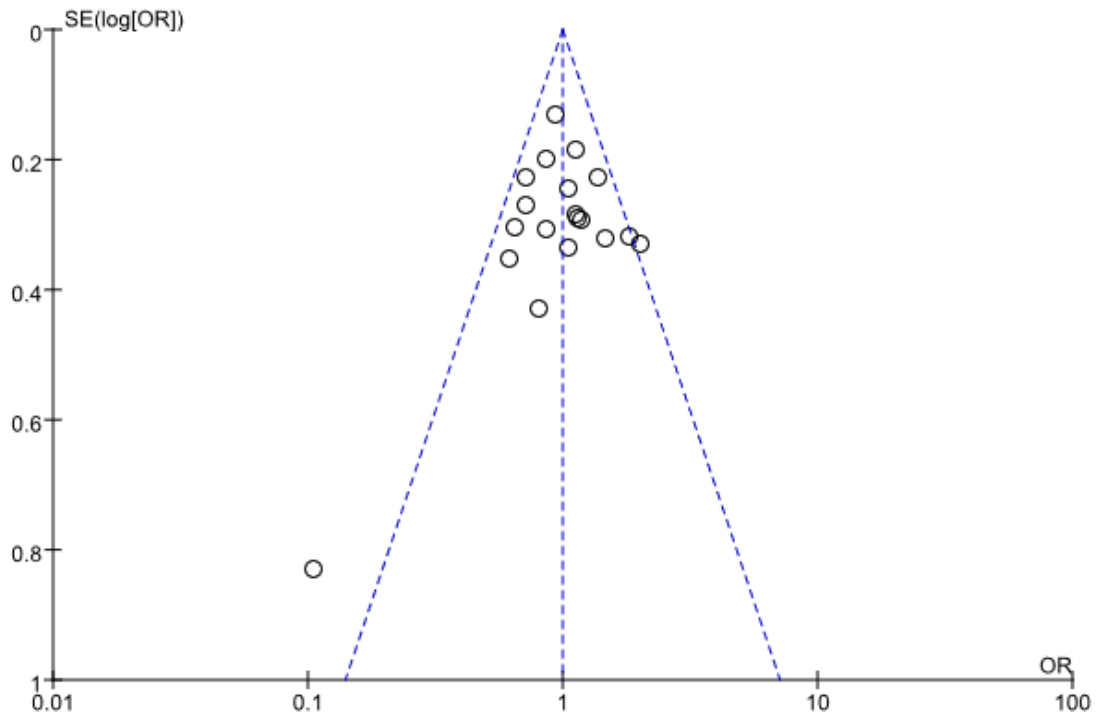

Funnel plot of **rs1801131** polymorphism and CHD under additive comparison

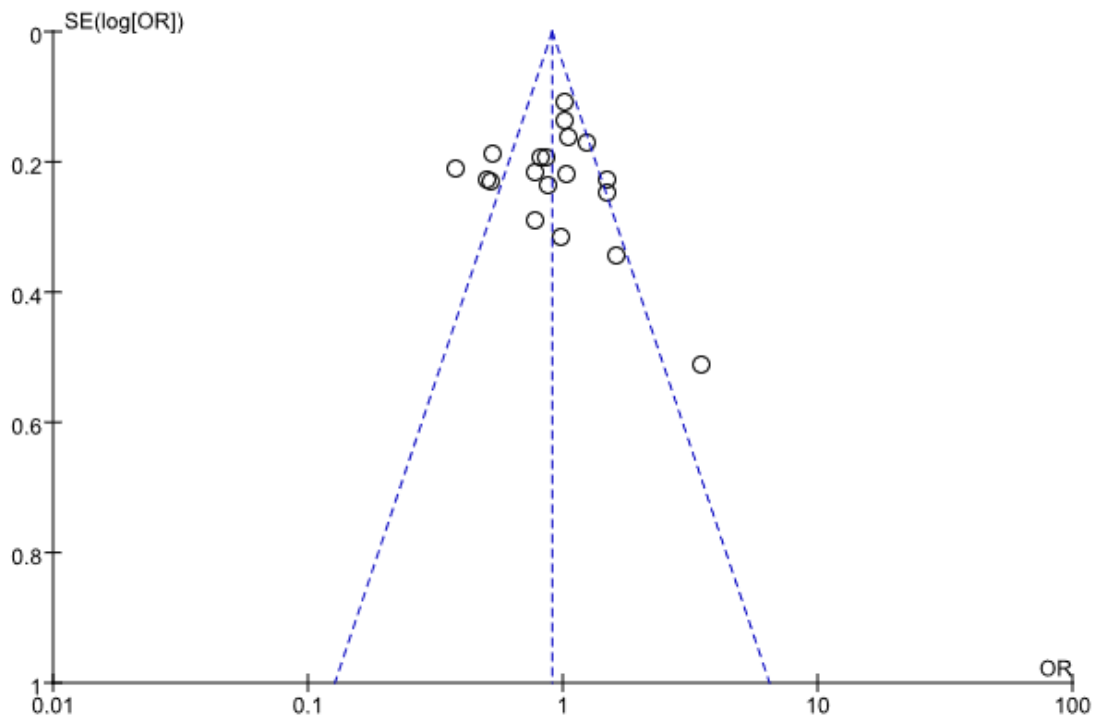

Funnel plot of **rs1801131** polymorphism and CHD under allele comparison

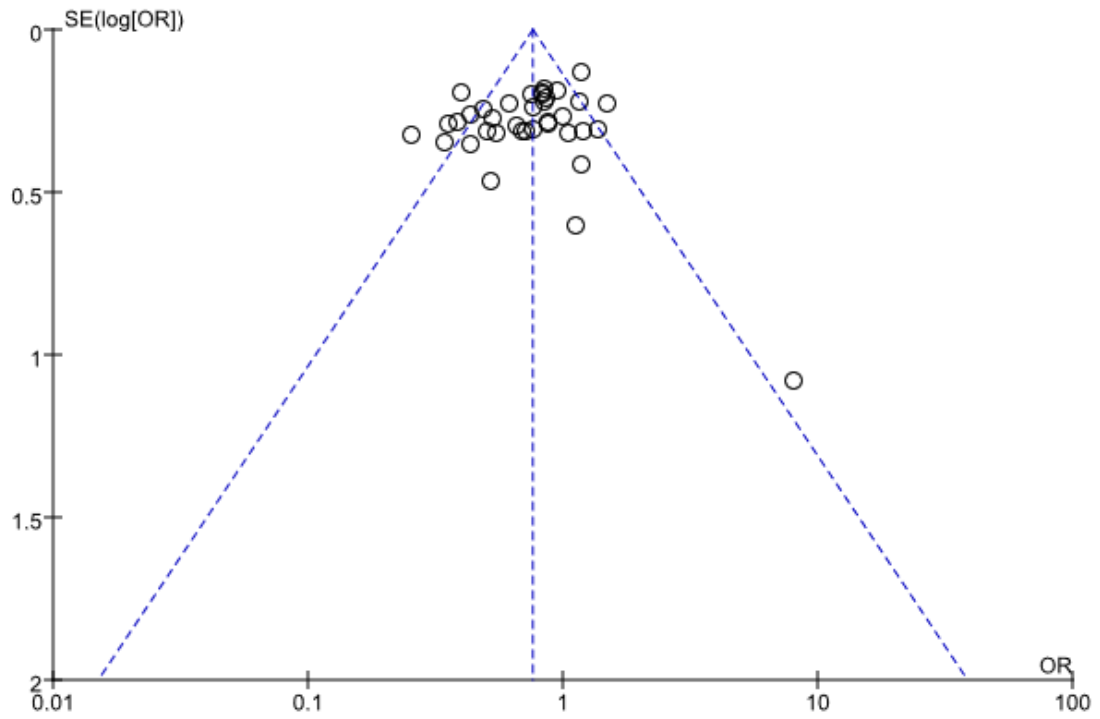

Funnel plot of **rs1801133** polymorphism and CHD under dominant comparison

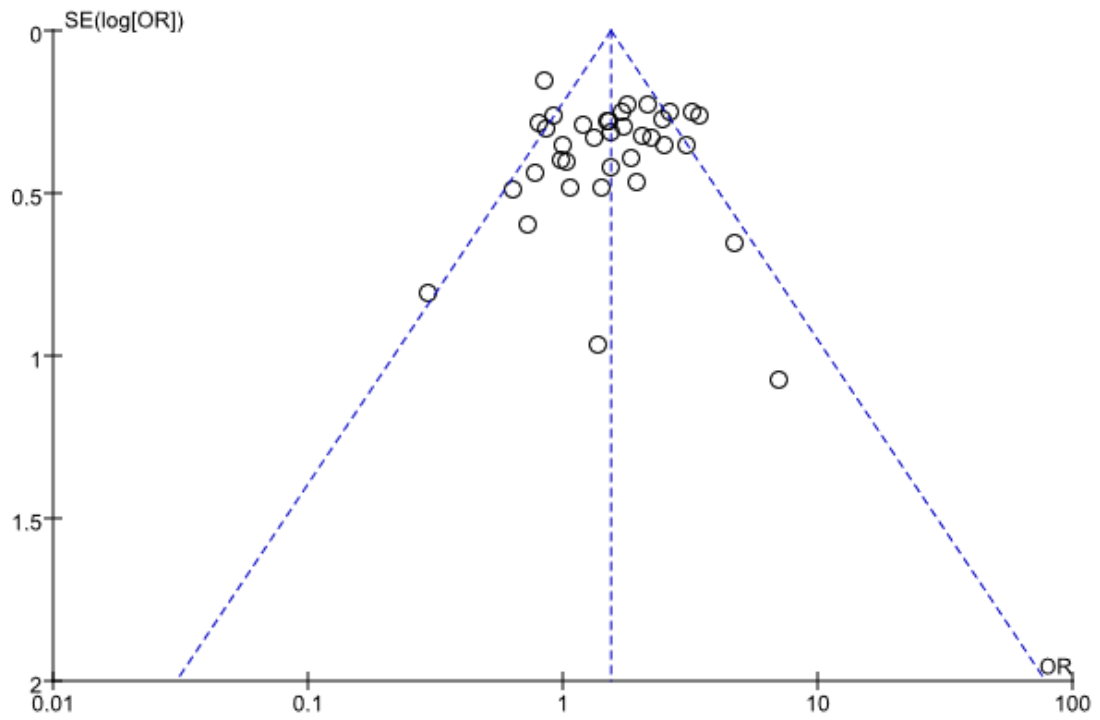

Funnel plot of **rs1801133** polymorphism and CHD under recessive comparison

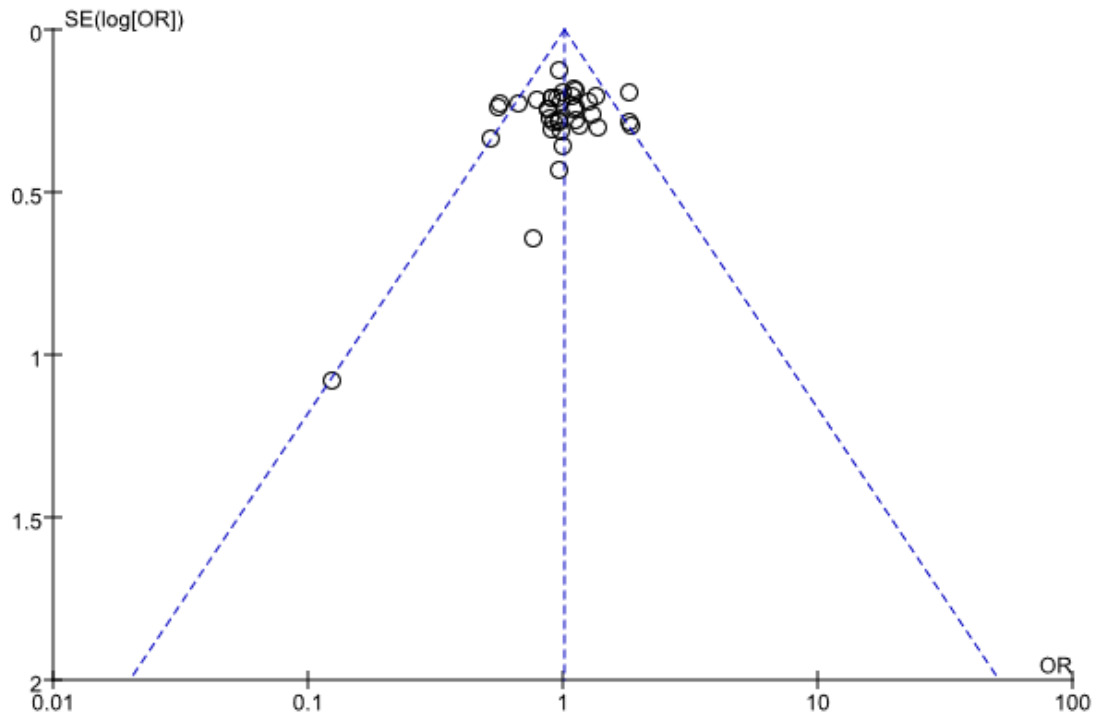

Funnel plot of **rs1801133** polymorphism and CHD under additive comparison

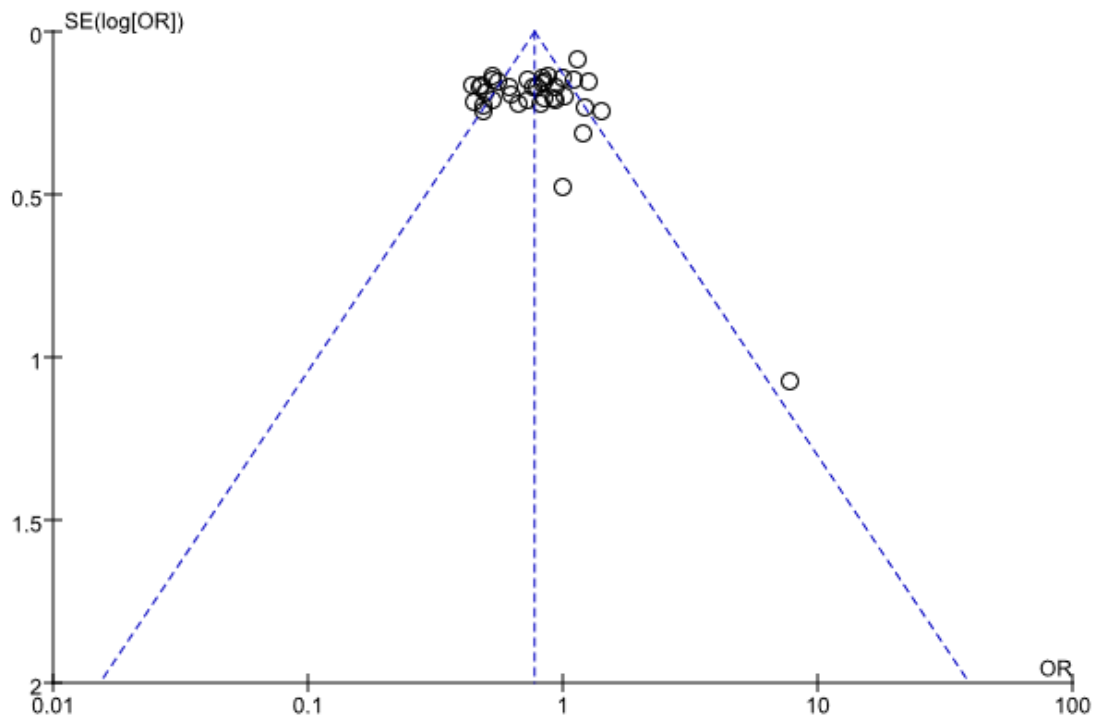

Funnel plot of **rs1801133** polymorphism and CHD under allele comparison
